# Supplementary material
Source: PubMed Central journal article supplement (PMC11027466)
Supplement: 262_2020_2630_MOESM1_ESM.pdf [file 262_2020_2630_MOESM1_ESM.pdf]

Supplementary materials

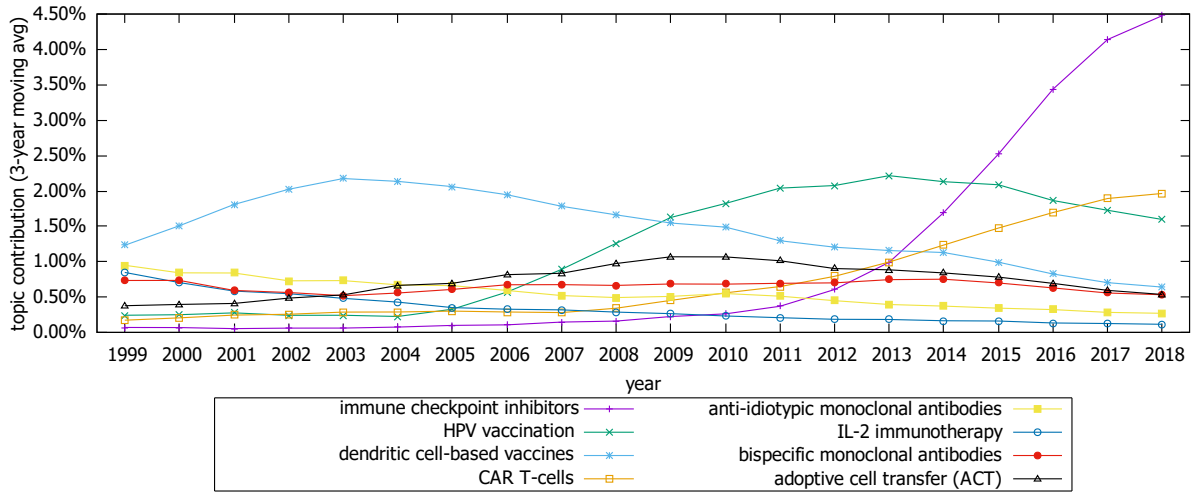

(a) Highest popular topics.

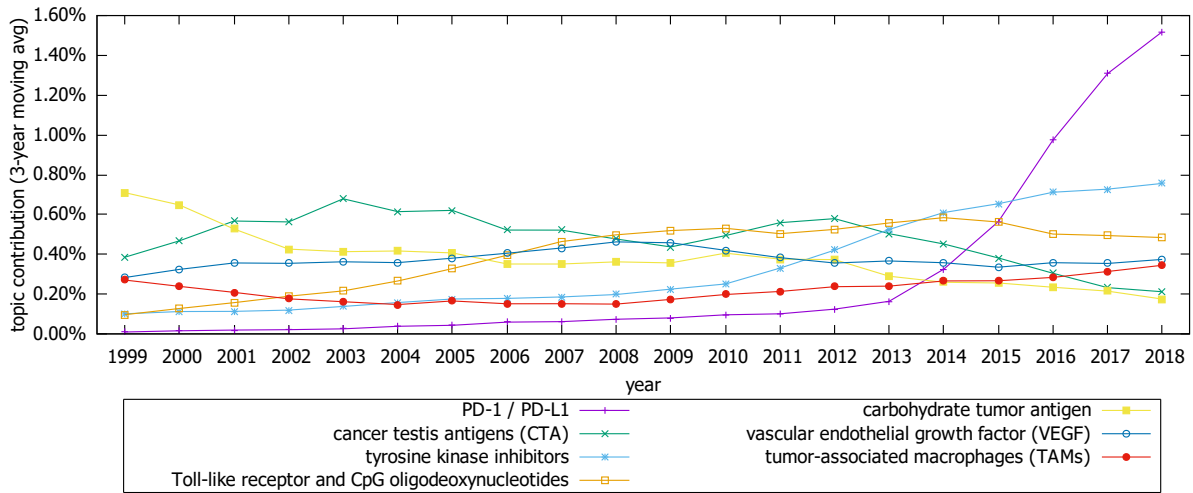

(b) Medium popular topics.

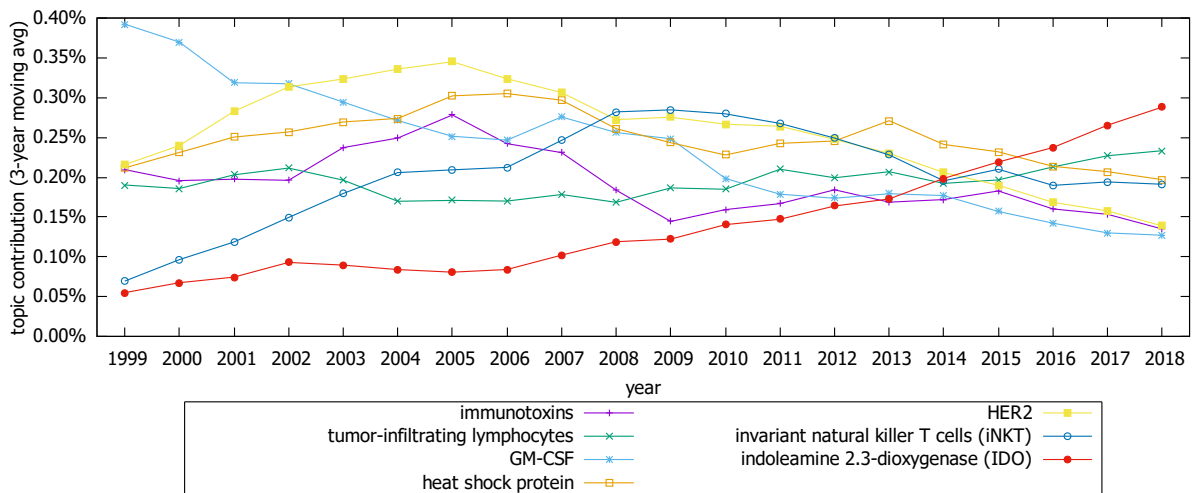

(c) Lowest popular topics.

Supp. Fig. 1 Trends of topics related to targeted immunotherapy category.

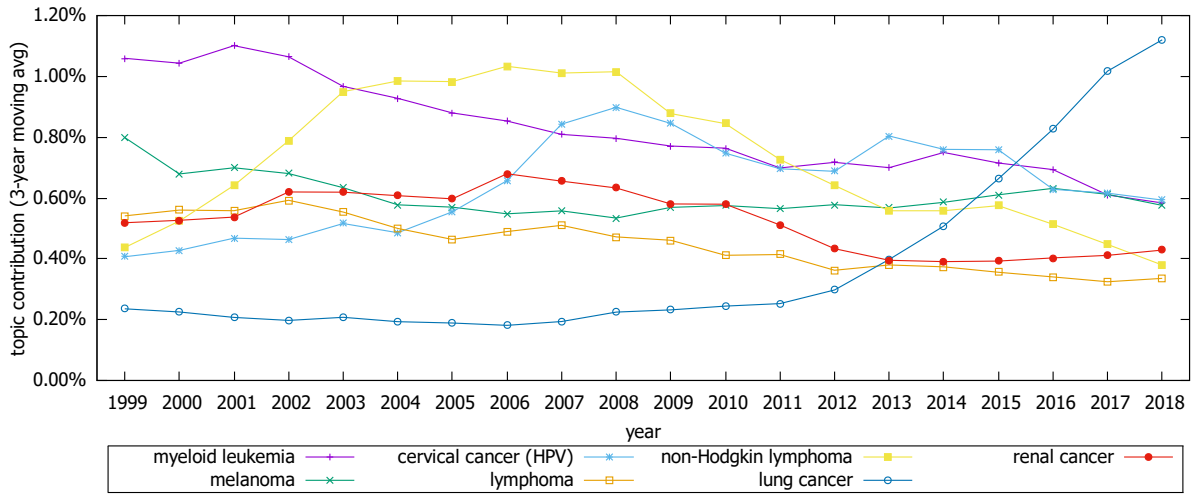

(a) Highest popular topics.

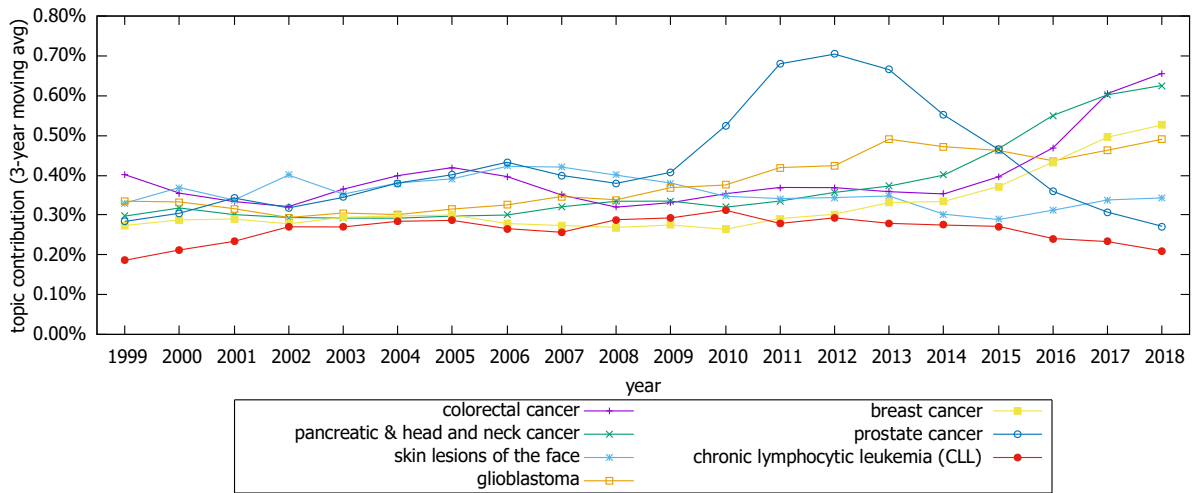

(b) Medium popular topics.

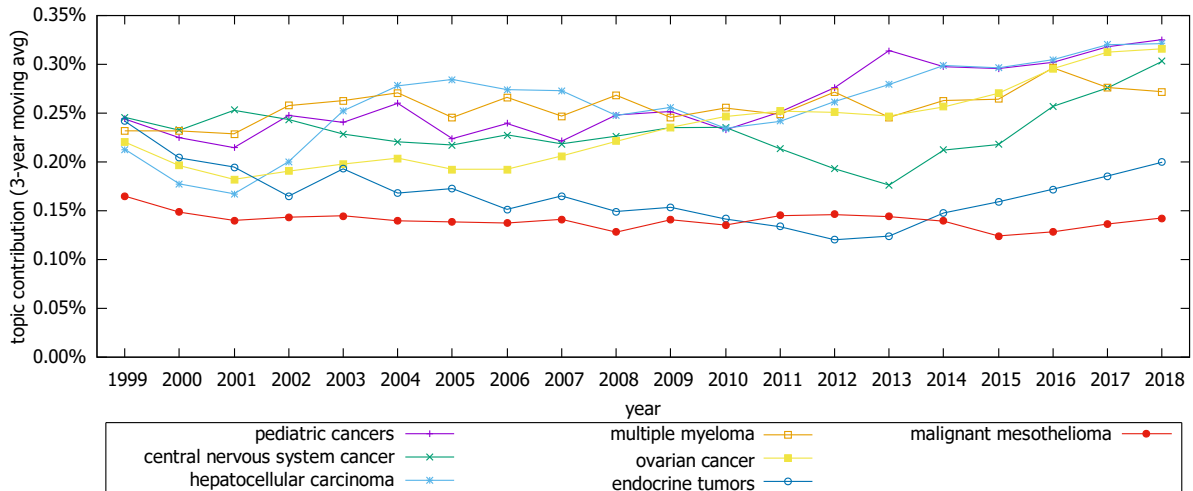

(c) Lowest popular topics.

Supp. Fig. 2 Trends of topics related to cancer type category.

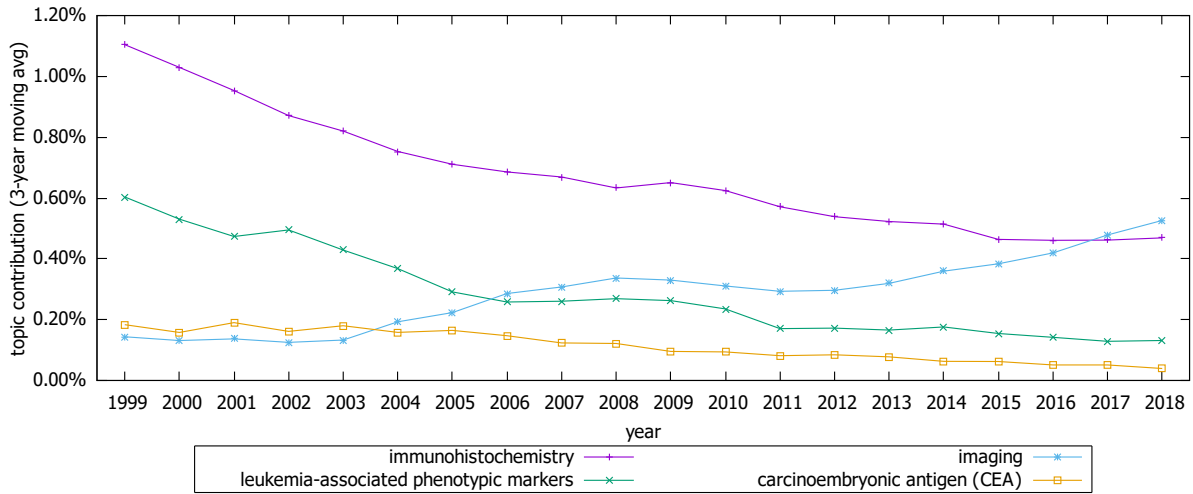

Supp. Fig. 3 Trends of topics related to diagnosis category.

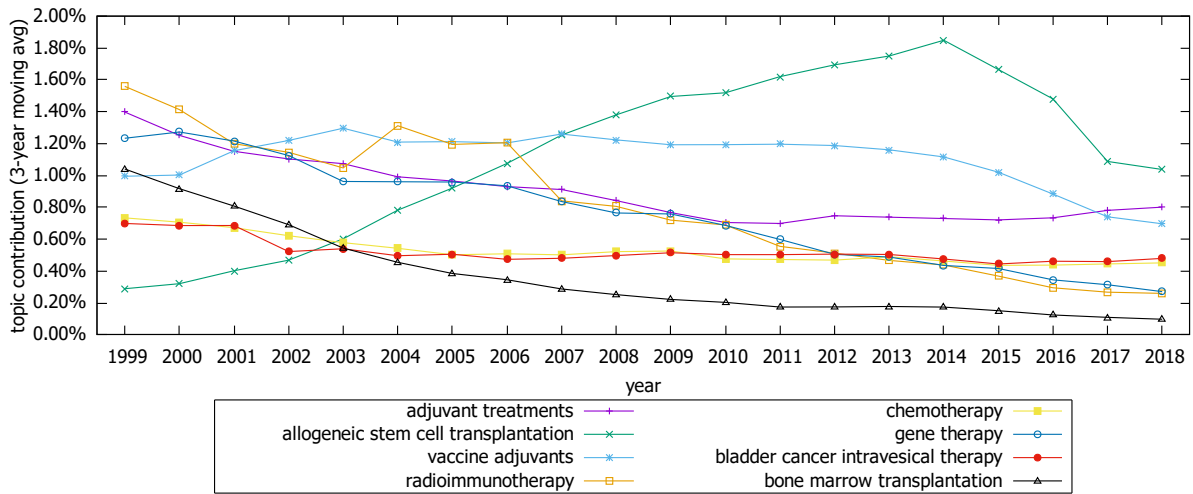

(a) Highest popular topics.

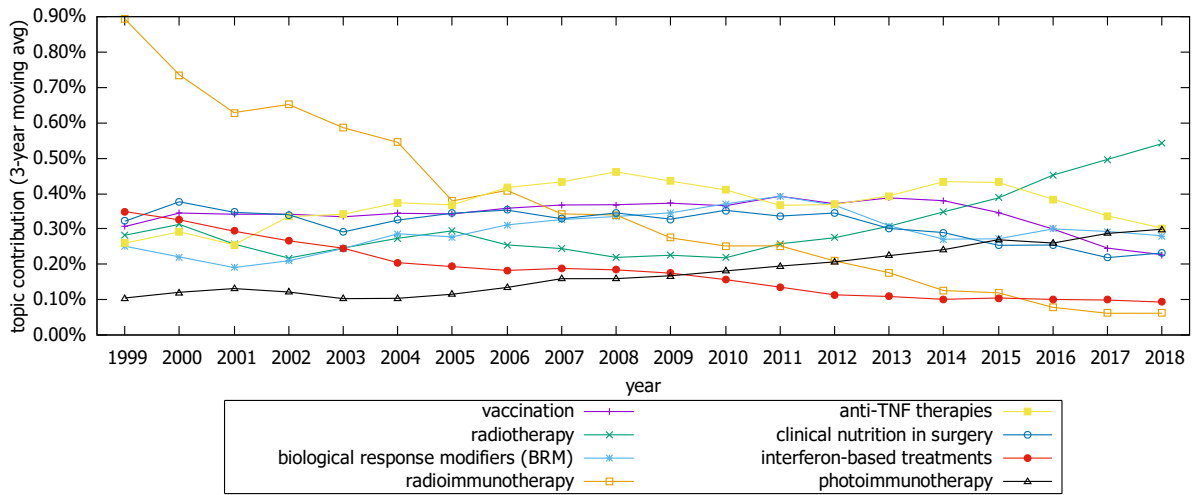

(b) Lowest popular topics.

Supp. Fig. 4 Trends of topics related to cancer therapies category.

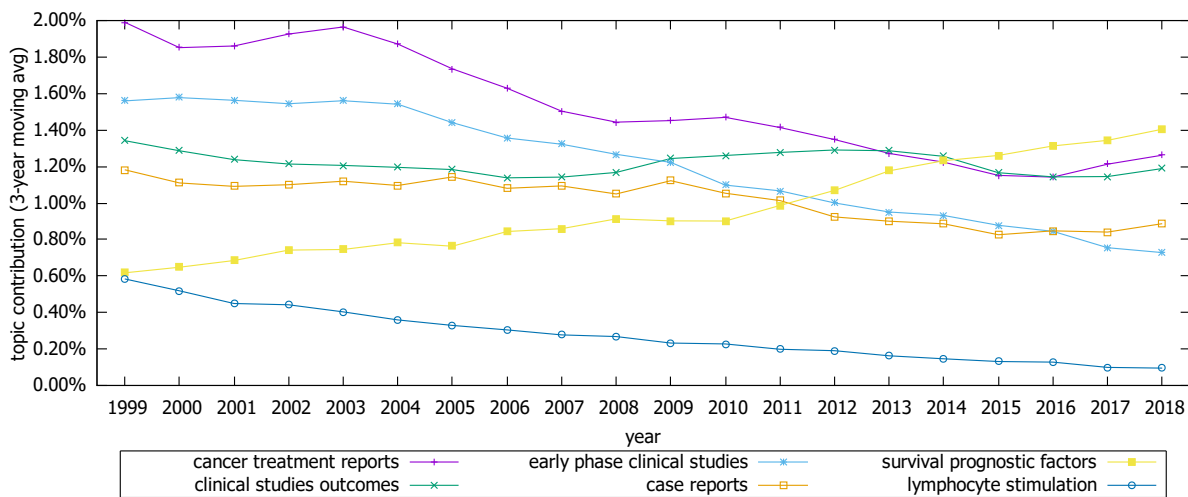

(a) Highest popular topics.

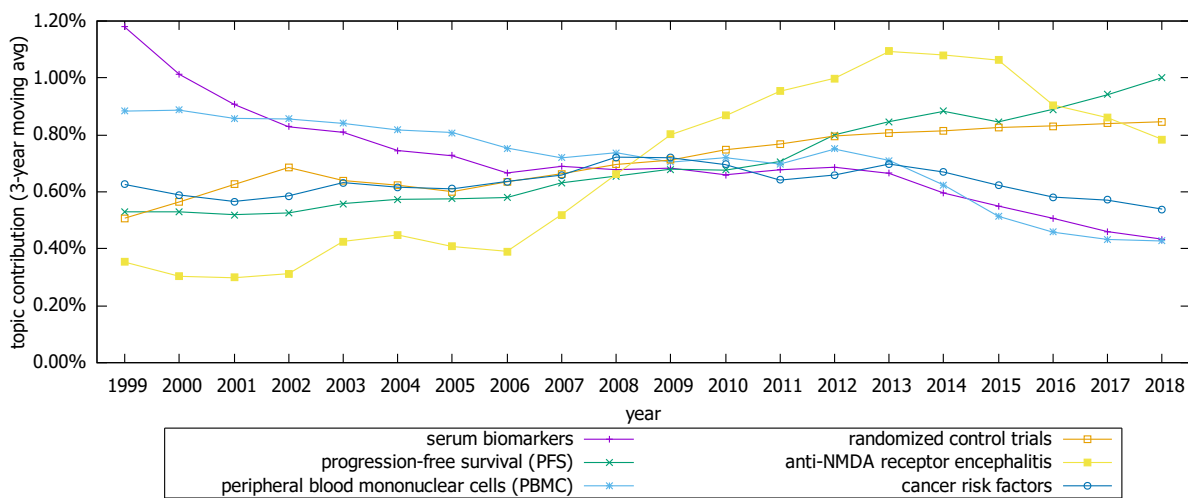

(b) Medium popular topics.

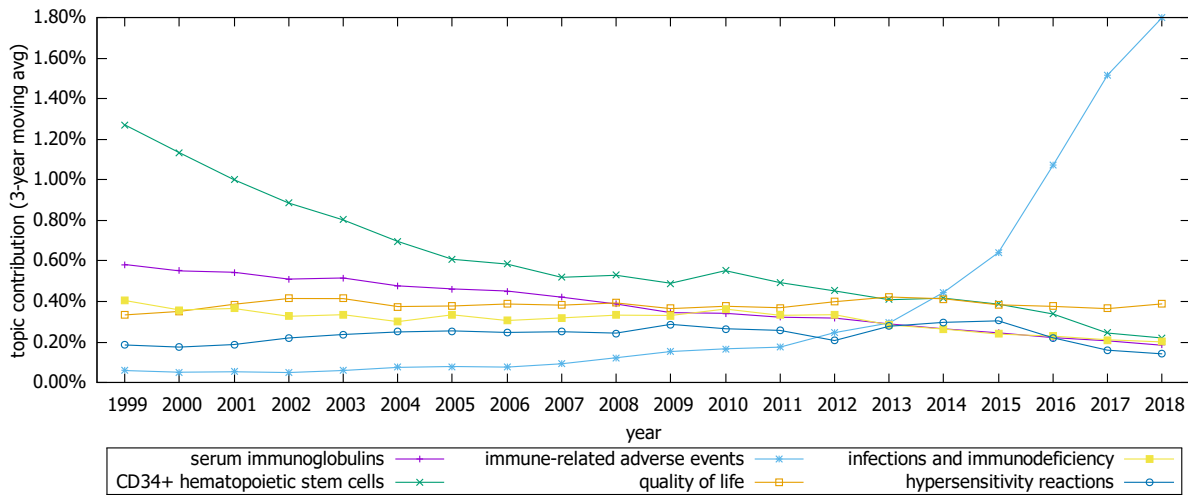

(c) Lowest popular topics.

Supp. Fig. 5 Trends of topics related to clinical research category.

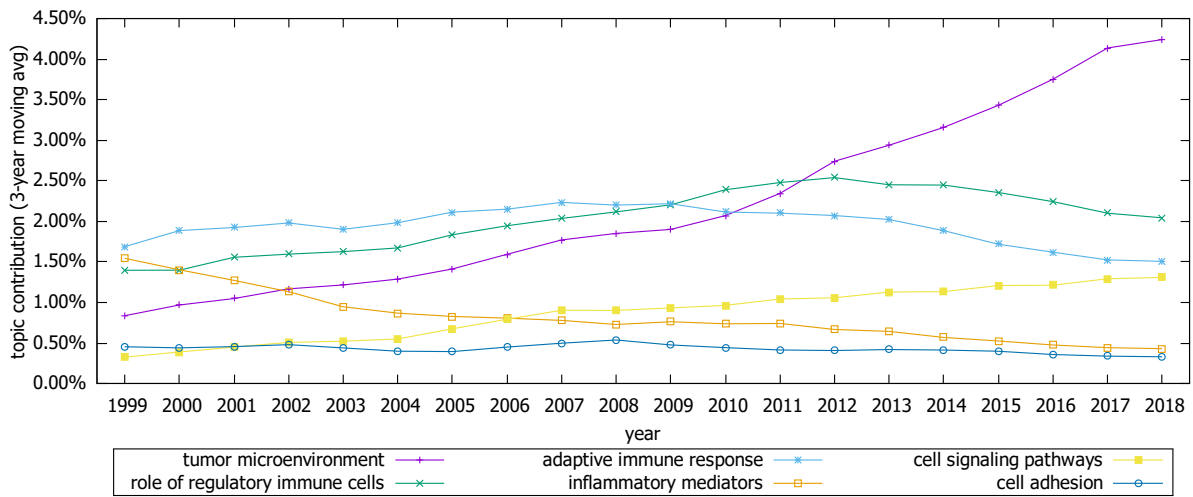

(a) Highest popular topics.

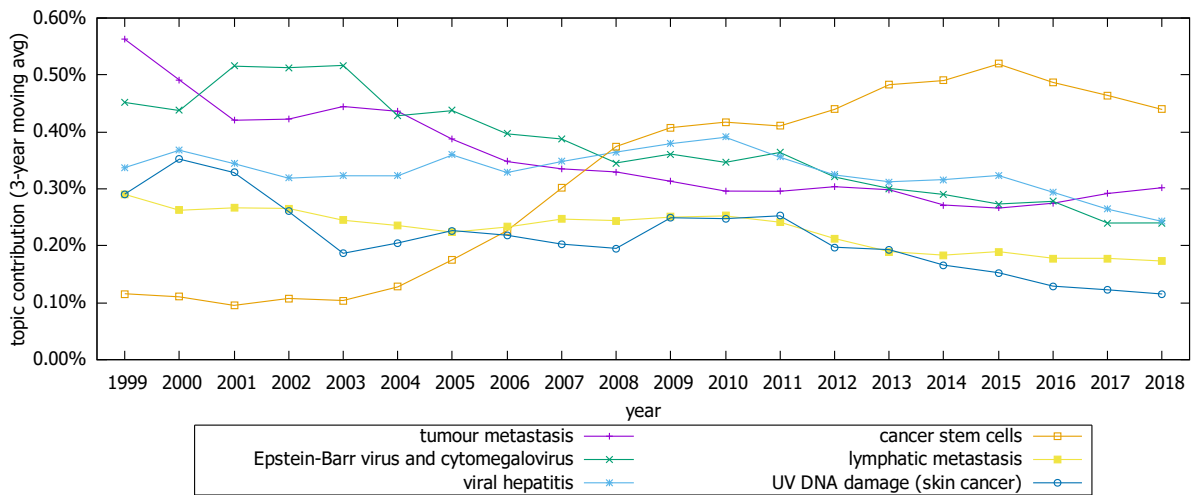

(b) Lowest popular topics.

Supp. Fig. 6 Trends of topics related to mechanisms of carcinogenesis category.

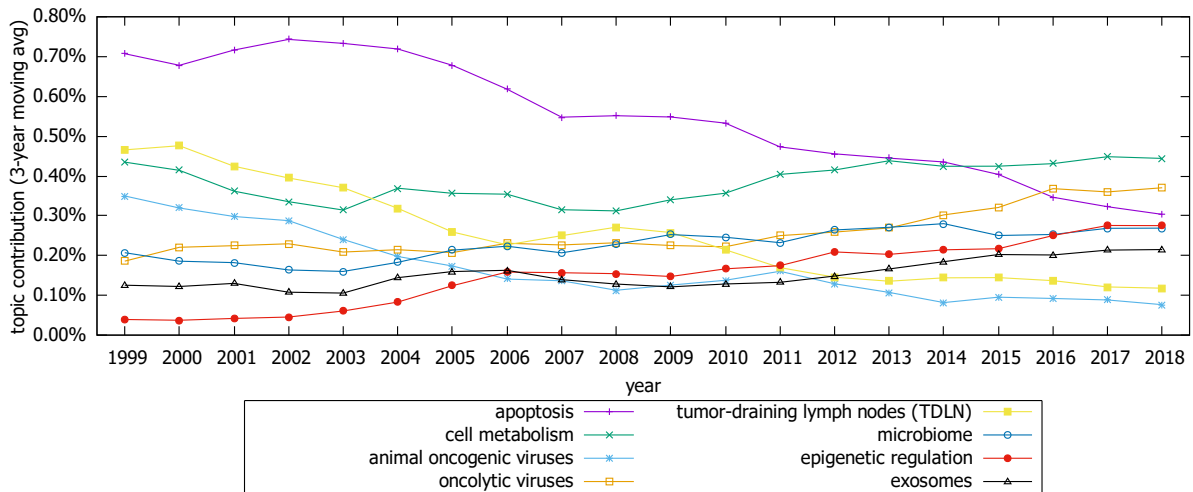

Supp. Fig. 7 Trends of topics related to pathways and physiology in translational research category.

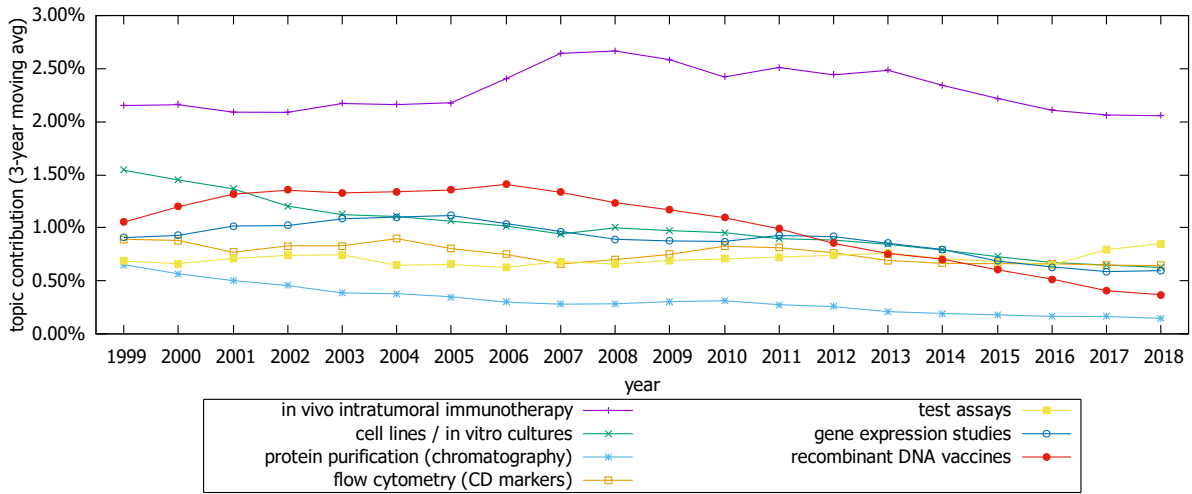

(a) Highest popular topics.

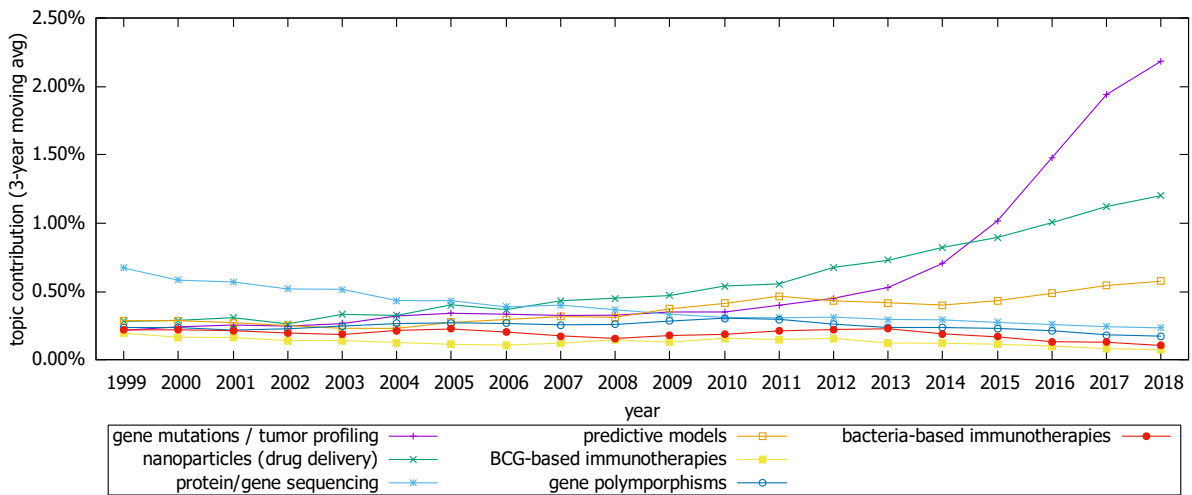

(b) Lowest popular topics.

Supp. Fig. 8 Trends of topics related to methodologies in translational research category.

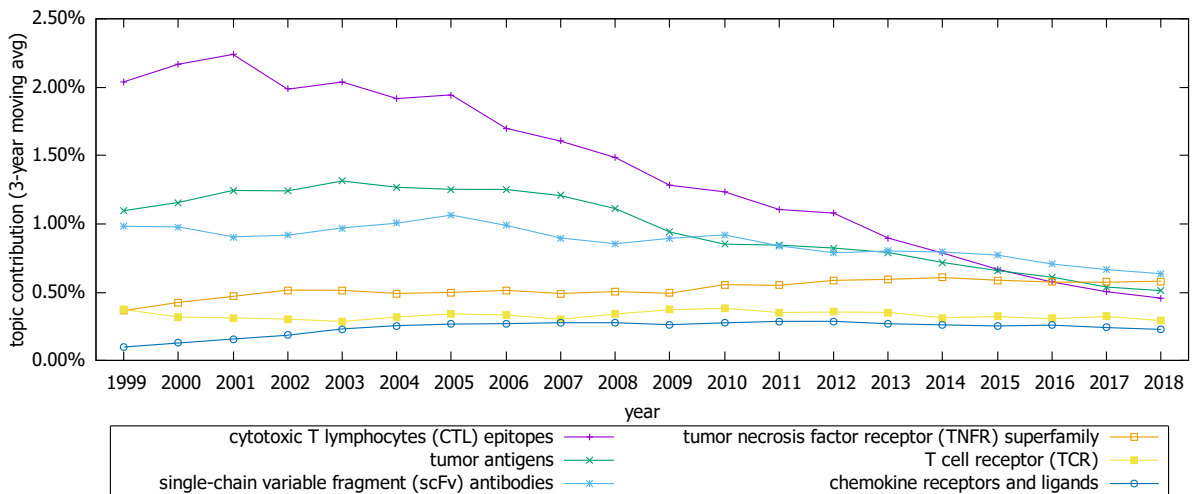

Supp. Fig. 9 Trends of topics related to protein-based translational research category.

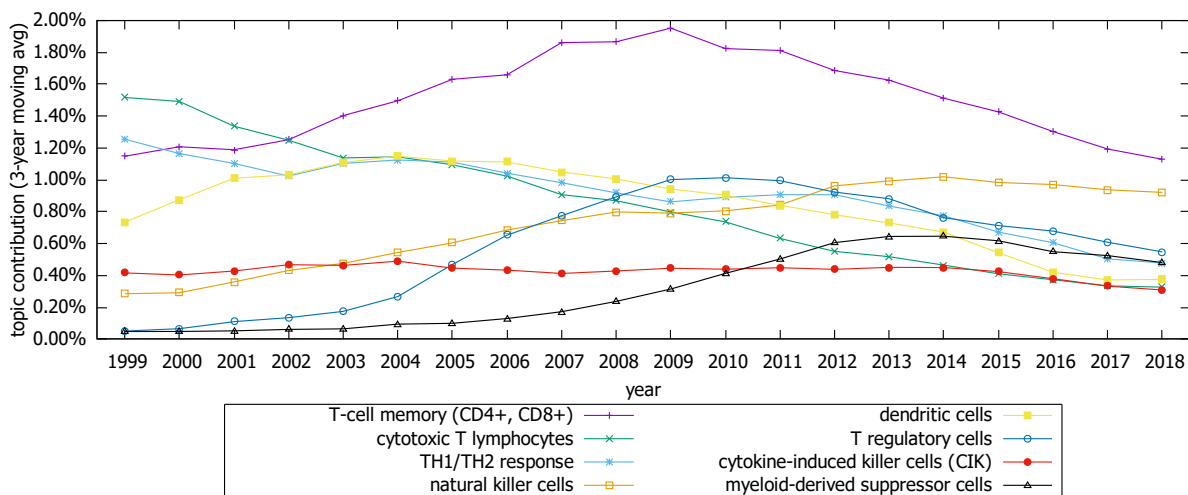

Supp. Fig. 10 Trends of topics related to cell types in translational research category.

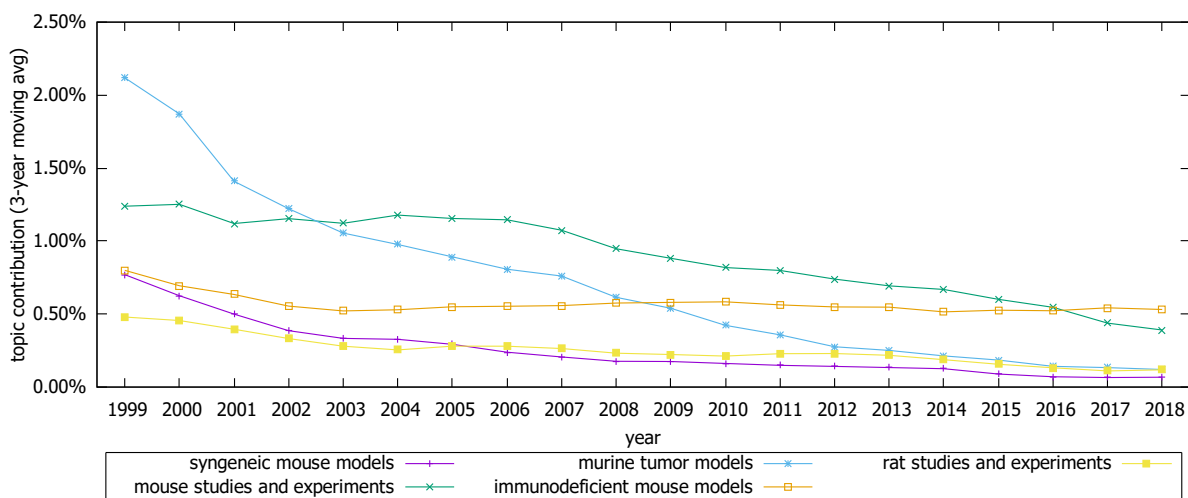

Supp. Fig. 11 Trends of topics related to animal models in translational research category.

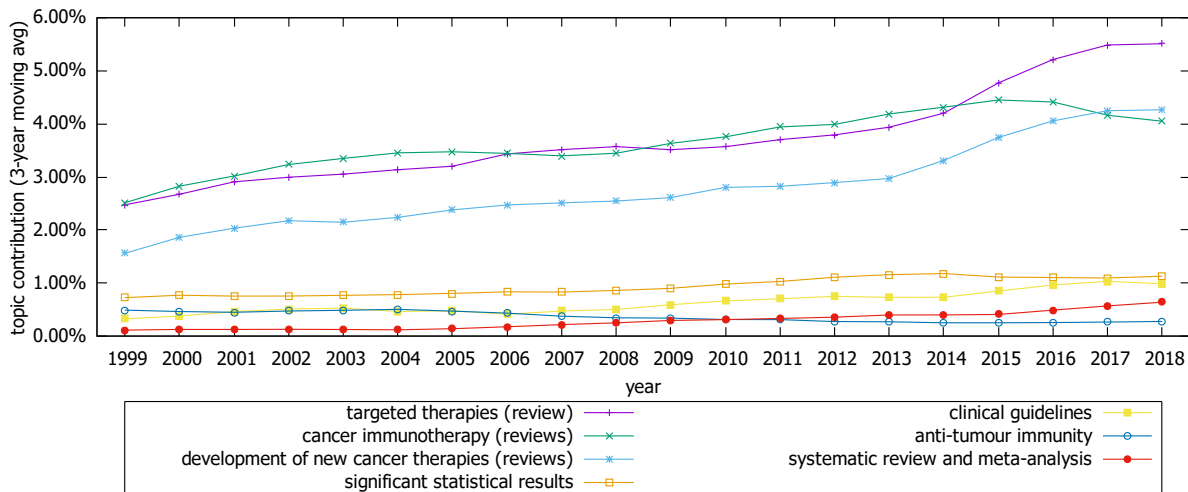

Supp. Fig. 12 Trends of topics related to the general category.
